# Supplementary material for: Predicting Depressive and Anxiety Symptoms Among Lebanese and Syrian adults in a Suburb of Beirut during the Concurrent Crises: A Population-Based Study
Source: medRxiv preprint, doi:10.1101/2024.10.25.24316097, version 1 (2024-10-27)

Supplemental Appendix

Predicting Depressive and Anxiety Symptoms Among Lebanese and Syrian adults in a Suburb of Beirut during the Concurrent Crises: A Population-Based Study

Authors

Hazar Shamas MSc1, Marie-Elizabeth Ragi MSc1, Berthe Abi Zeid MPH1,2, Jocelyn DeJong PhD3, Stephen J. McCall DPhil1* with the CAEP Study Group¶

Affiliations

1Center for Research on Population and Health, Faculty of Health Sciences, American University of Beirut, Beirut, Lebanon

2Department of Health Promotion, Education, and Behavior, University of South Carolina, Columbia, South Carolina, USA

3Department of Epidemiology and Population Health, Faculty of Health Sciences, American University of Beirut, Beirut, Lebanon

*Corresponding author: Stephen J. McCall, Center for Research on Population and Health, Faculty of Health Sciences, American University of Beirut, Beirut 1107 2020, Lebanon; sm227@aub.edu.lb

Contents

[METHODS 3](#_Toc178881068)

[Assessment of capacity to consent 3](#_Toc178881069)

[Table S1. University of California, San Diego, Brief Assessment of Capacity to Consent (UBACC) items 3](#_Toc178881070)

[Patient Health Questionnaire-9 (PHQ-9) items 3](#_Toc178881071)

[Table S2. Patient Health Questionnaire-9 (PHQ-9) 3](#_Toc178881072)

[General Anxiety Disorder 7-item scale items 4](#_Toc178881073)

[Table S3. General Anxiety Disorder 7-item (GAD-7) scale 4](#_Toc178881074)

[RESULTS 5](#_Toc178881075)

[Significant unadjusted ORs representing association between depressive and anxiety symptoms among Lebanese and Syrians along with their 95%CIs 5](#_Toc178881076)

[Table S4. Characteristics of Lebanese participants and their association with anxiety symptoms 7](#_Toc178881077)

[Table S5. Characteristics of Syrian participants and their association with anxiety symptoms 9](#_Toc178881078)

[Table S6. Predictors of depressive and anxiety symptoms among Lebanese adults 11](#_Toc178881079)

[Table S7. Predictors of depressive and anxiety symptoms among Syrian adults 13](#_Toc178881080)

[Figure S1. Calibration plot of Lebanese anxiety symptom prediction model 15](#_Toc178881081)

[Figure S2. Calibration plot of Syrian anxiety symptom prediction model 16](#_Toc178881082)

[Table S1. University of California, San Diego, Brief Assessment of Capacity to Consent (UBACC) items 3](#_Toc156727553)

[Table S2. Patient Health Questionnaire-9 (PHQ-9) 3](#_Toc156727555)

[Table S3. General Anxiety Disorder 7-item scale 4](#_Toc156727557)

[Table S4. Adaptive LASSO model coefficients and LASSO for inference for the Lebanese and Syrian participants 12](#_Toc156728725)

# METHODS

## Assessment of capacity to consent

## Table S1. University of California, San Diego, Brief Assessment of Capacity to Consent (UBACC) items

| 1.What is the purpose of the study that was just described to you? **(2 = the objective of the study)** | 0 | 1 | 2 |
| --- | --- | --- | --- |
| 2.Do you believe this is primarily research or primarily treatment? **(2 = Research)** | 0 | 1 | 2 |
| 3.Do you have to be in this study if you do not want to participate? **(2 = No)** | 0 | 1 | 2 |
| 4.If you participate in this study, what are some of the things that you will be  asked to do? **(2= Answer questions)** | 0 | 1 | 2 |
| 5.Is it possible that being in this study will not have any benefit to you? **(2 = Yes)** | 0 | 1 | 2 |

## Patient Health Questionnaire-9 (PHQ-9) items

## Table S2. Patient Health Questionnaire-9 (PHQ-9)

| Over the last 2 weeks, how often have you been bothered by any of the following problems? | Not at all | Several days | More than half of the days | Nearly everyday |
| --- | --- | --- | --- | --- |
| 1.Little interest or pleasure in doing things | 0 | 1 | 2 | 3 |
| 2.Feeling down, depressed, or hopeless | 0 | 1 | 2 | 3 |
| 3.Trouble falling or staying asleep or sleeping too much | 0 | 1 | 2 | 3 |
| 4.Feeling tired or having little energy | 0 | 1 | 2 | 3 |
| 5.Poor appetite or overeating | 0 | 1 | 2 | 3 |
| 6.Feeling bad about yourself – or that you are a failure or have let yourself or your family down | 0 | 1 | 2 | 3 |
| 7.Trouble concentrating on things, such as reading the newspaper or watching television | 0 | 1 | 2 | 3 |
| 8.Moving or speaking so slowly that other people could have noticed? Or the opposite -being so fidgety or restless that you have been moving around a lot more than usual | 0 | 1 | 2 | 3 |
| 9.Thoughts that you would be better off dead or of hurting yourself in some way | 0 | 1 | 2 | 3 |

## General Anxiety Disorder 7-item scale items

## Table S3. General Anxiety Disorder 7-item (GAD-7) scale

| Over the last 2 weeks, how often have you been bothered by any of the following problems? | Not at all | Several days | More than half of the days | Nearly everyday |
| --- | --- | --- | --- | --- |
| 1.Feeling nervous, anxious, or on edge | 0 | 1 | 2 | 3 |
| 2.Not being able to stop or control worrying | 0 | 1 | 2 | 3 |
| 3.Worrying too much about different things | 0 | 1 | 2 | 3 |
| 4.Trouble relaxing | 0 | 1 | 2 | 3 |
| 5.Being so restless that it is hard to sit still | 0 | 1 | 2 | 3 |
| 6.Becoming easily annoyed or irritable | 0 | 1 | 2 | 3 |
| 7.Feeling afraid, as if something awful might happen | 0 | 1 | 2 | 3 |

# RESULTS

## Significant unadjusted ORs representing association between depressive and anxiety symptoms among Lebanese and Syrians along with their 95%CIs

Among the Lebanese participants, factors associated with having depressive symptoms were school not completed compared to school not attended (OR:0.49; 95%CI:0.31-0.75), school completed compared to school not attended (OR:0.24; 95%CI:0.13-0.42), completed vocational school compared to school not attended (OR:0.40; 95%CI:0.22-0.72), completed higher education compared to school not attended (OR:0.24; 95%CI:0.15-0.41), being married compared to being single (OR:1.49; 95%CI: 1.11-1.99), being divorced/ separated/ widowed compared to being single (OR:1.94; 95%CI: 1.27-2.97), having pain that impacted usual activity compared to not having pain that impacted usual activity (OR:1.81; 95%CI:1.38-2.38), number of chronic illnesses (OR:1.18; 95%CI:1.05-1.32), received an eviction notice compared to not receiving an eviction notice (OR:1.72; 95%CI:1.05-2.83), living in an owned home compared to not receiving an eviction notice (OR:0.75; 95%CI:0.58-0.98), household being water insecure compared to being secure (OR:2.27; 95%CI:1.65-3.12), household being food insecure compared to being secure (OR:6.46; 95%CI:4.33-9.64), being employed compared to not being employed (OR:0.76; 95%CI:0.58-0.98), being in debt compared to not having debt (OR:3.31; 95%CI:2.49-4.39), feeling somewhat safe compared to feeling very safe at home (OR:1.66 95%CI:1.27-2.16), not feeling safe at all compared to feeling very safe at home (OR:3.68; 95%CI:1.92-7.05), living in their owned home compared to living in a rented home (OR:0.63; 95%CI:0.48-0.81), and having two to five people as people to count on in difficult times compared to having none (OR:0.34; 95%CI:0.23-0.48) (Table 1).

Factors associated with anxiety symptoms were school not completed compared to school not attended (OR:0.53; 95%CI:0.34-0.81), school completed compared to school not attended (OR:0.35; 95%CI:0.21-0.60), completed vocational school compared to school not attended (OR:0.42; 95%CI:0.24-0.74), completed higher education compared to school not attended (OR:0.27; 95%CI:0.16-0.44), having pain that impacted usual activity compared to not having pain that impacted usual activity (OR:1.52; 95%CI:1.18-1.97), receiving an eviction notice compared to not receiving an eviction notice (OR:1.83; 95%CI:1.13-2.97), household being food insecure compared to being secure (OR:4.07; 95%CI:2.97-5.60), being in debt compared to not having debt (OR:3.97; 95%CI:3.01-5.24), feeling somewhat safe compared to feeling very safe at home (OR:1.96; 95%CI:1.53-2.51), not feeling safe at all compared to feeling very safe at home (OR:3.24; 95%CI:1.69-6.18), living in their owned home compared to living in a rented home (OR:0.75; 95%CI:0.59-0.95), having two to five and six or more people as people to count on in difficult times compared to having none (OR:0.40; 95%CI:0.29-0.56) and (OR:0.37; 95%CI:0.15-0.90) respectively (Supplemental Table 4).

Among the Syrian participants, factors associated with depressive symptoms were school not completed compared to school not attended (OR:0.48; 95%CI:0.29-0.78), school completed compared to school not attended (OR:0.30; 95%CI:0.14-0.63), having pain that impacted usual activity compared to not having pain that impacted usual activity (OR:2.05; 95%CI:1.43-2.92), number of chronic illnesses (OR:1.34; 95%CI:1.02-1.77), had an eviction notice (OR:2.12; 95%CI:1.44-3.13), household being water insecure compared to being secure (OR:1.74; 95%CI:1.17-2.60), household being food insecure compared to being secure (OR:6.77; 95%CI:2.83-16.21), being in debt compared to not having debt (OR:3.66; 95%CI:2.21-6.06), felt somewhat safe (OR:1.87; 95%CI:1.31-267), not feeling safe at all compared to feeling very safe at home (OR:7.17; 95%CI:3.39-15.14), and having regularised residency documents (OR:0.49 95%CI:0.32-0.75) (Table 2).

Factors associated with anxiety symptoms were school completed compared to school not attended (OR:0.44; 95%CI:0.21-0.94), completed higher education compared to school not attended (OR:0.31; 95%CI:0.10-0.92), being married compared to being single (OR:1.87; 95%CI:1.18-2.96), being divorced/ separated/ widowed compared to being single (OR:2.42; 95%CI:1.01-5.81), having pain that impacted usual activity compared to not having pain that impacted usual activity (OR:1.67; 95%CI:1.17-2.37), receiving an eviction notice compared to not receiving an eviction notice (OR:1.66; 95%CI:1.13-2.43), household being water insecure compared to being secure (OR:1.49; 95%CI:1.01-2.20), household being food insecure compared to being secure (OR:3.68; 95%CI:1.90-7.14), being in debt compared to not having debt (OR:3.17; 95%CI:1.99-5.04), feeling somewhat safe compared to feeling very safe at home (OR:1.49; 95%CI:1.05-2.11), not feel safe at all compared to feeling very safe (OR:3.39; 95%CI:1.62-7.06), having one person to count on in difficult times compared to having none (OR:2.25; 95%CI:1.46-3.47), and having six or more people as people to count on in difficult times compared to none (OR:0.20; 95%CI:0.04-0.99) (Supplemental Table 5).

## Table S4. Characteristics of Lebanese participants and their association with anxiety symptoms

|  | Total |  | GAD-7<10 | | GAD-7≥10 | | Odds Ratio | (95%CI) | |
| --- | --- | --- | --- | --- | --- | --- | --- | --- | --- |
|  | n=1,301 | (%) | n=899 | (69.1%) | n=402 | (30.9%) |  |  |  |
| **Age Median (IQR)** | 50 | (35-63) | 50 | (34-63) | 51 | (36-63) | 1.00 | (1.00-1.01) | |
| Missing | 8 |  | 6 |  | 2 |  |  |  |  |
| **Sex** |  |  |  |  |  |  |  |  |  |
| Male | 591 | (45.6) | 409 | (69.2) | 182 | (30.8) |  |  |  |
| Female | 710 | (54.4) | 490 | (69.1) | 220 | (30.9) | 1.00 | (0.79-1.27) | |
| **Education** |  |  |  |  |  |  |  |  |  |
| School not attended | 101 | (8.6) | 52 | (51.9) | 49 | (48.1) |  |  |  |
| School not completed | 578 | (47.6) | 387 | (67.1) | 191 | (32.9) | 0.53 | (0.34-0.81) | |
| School completed | 175 | (14.1) | 131 | (75.2) | 44 | (24.8) | 0.35 | (0.21-0.60) | |
| Vocational | 116 | (9.3) | 83 | (72.1) | 33 | (27.9) | 0.42 | (0.24-0.74) | |
| Higher education | 252 | (20.4) | 202 | (80.1) | 50 | (19.9) | 0.27 | (0.16-0.44) | |
| Missing | 79 |  | 44 |  | 35 |  |  |  |  |
| **Marital status** |  |  |  |  |  |  |  |  |  |
| Single/ Engaged | 437 | (33.9) | 316 | (71.9) | 121 | (28.1) |  |  |  |
| Married | 718 | (54.6) | 491 | (68.5) | 227 | (31.5) | 1.18 | (0.91-1.54) | |
| Divorced/ Separated/ Widowed | 146 | (11.6) | 92 | (64.1) | 54 | (35.9) | 1.44 | (0.96-2.14) | |
| **Pain that impacted usual activity** |  |  |  |  |  |  |  |  |  |
| No | 929 | (71.1) | 666 | (71.7) | 263 | (28.3) |  |  |  |
| Yes | 370 | (28.9) | 231 | (62.5) | 139 | (37.5) | 1.52 | (1.18-1.97) | |
| Missing | 2 |  | 2 |  | 0 |  |  |  |  |
| **No. of chronic illness Range (0-6) Median (IQR)** | 0 | (0-1) | 0 | (0-1) | 0 | (0-1) | 1.09 | (0.98-1.22) | |
| **Eviction notice** |  |  |  |  |  |  |  |  |  |
| No | 623 | (47.5) | 431 | (69.0) | 192 | (31.0) |  |  |  |
| Yes | 80 | (5.9) | 45 | (54.9) | 35 | (45.1) | 1.83 | (1.13-2.97) | |
| Owned | 588 | (46.7) | 416 | (71.0) | 172 | (29.0) | 0.91 | (0.71-1.17) | |
| Missing | 10 |  | 7 |  | 3 |  |  |  |  |
| **Household water insecurity** |  |  |  |  |  |  |  |  |  |
| Secure | 380 | (30.3) | 269 | (70.8) | 111 | (29.2) |  |  |  |
| Insecure | 881 | (69.7) | 594 | (67.5) | 287 | (32.5) | 1.17 | (0.90-1.53) | |
| Missing | 40 |  | 36 |  | 4 |  |  |  |  |
| **Household food insecurity** |  |  |  |  |  |  |  |  |  |
| Secure | 425 | (35.3) | 369 | (86.8) | 56 | (13.2) |  |  |  |
| Insecure | 799 | (64.7) | 493 | (61.6) | 306 | (38.4) | 4.07 | (2.97-5.60) | |
| Missing | 77 |  | 37 |  | 40 |  |  |  |  |
| **Employment status** |  |  |  |  |  |  |  |  |  |
| No | 720 | (56.2) | 484 | (67.3) | 236 | (32.7) |  |  |  |
| Yes | 575 | (43.8) | 413 | (71.9) | 162 | (28.1) | 0.81 | (0.63-1.03) | |
| Missing | 6 |  | 2 |  | 4 |  |  |  |  |
| **Having debt** |  |  |  |  |  |  |  |  |  |
| No | 858 | (73.4) | 677 | (78.7) | 181 | (21.3) |  |  |  |
| Yes | 324 | (26.6) | 155 | (48.2) | 169 | (51.8) | 3.97 | (3.01-5.24) | |
| Missing | 119 |  | 67 |  | 52 |  |  |  |  |
| **Feeling safe inside home** |  |  |  |  |  |  |  |  |  |
| Very safe | 731 | (57.0) | 553 | (75.7) | 178 | (24.3) |  |  |  |
| Somewhat safe | 514 | (39.9) | 316 | (61.5) | 198 | (38.5) | 1.96 | (1.53-2.51) | |
| Not safe at all | 40 | (3.1) | 20 | (49.1) | 20 | (50.9) | 3.24 | (1.69-6.18) | |
| Missing | 16 |  | 10 |  | 6 |  |  |  |  |
| **Type of tenure** |  |  |  |  |  |  |  |  |  |
| Rented | 629 | (48.1) | 416 | (65.8) | 213 | (34.2) |  |  |  |
| Owned | 638 | (50.9) | 458 | (72.0) | 180 | (28.0) | 0.75 | (0.59-0.95) | |
| Other | 13 | (1.0) | 10 | (77.3) | 3 | (22.7) | 0.57 | (0.15-2.09) | |
| Missing | 21 |  | 15 |  | 6 |  |  |  |  |
| **Number of people to count on in difficult times** |  |  |  |  |  |  |  |  |  |
| None | 227 | (17.2) | 134 | (58.5) | 93 | (41.5) |  |  |  |
| One | 451 | (35.3) | 277 | (61.9) | 174 | (38.1) | 0.87 | (0.63-1.21) | |
| Two to five | 583 | (44.8) | 455 | (77.9) | 128 | (22.1) | 0.40 | (0.29-0.56) | |
| Six and more | 32 | (2.7) | 25 | (79.1) | 7 | (20.9) | 0.37 | (0.15-0.90) | |
| None | 8 |  | 8 |  | 0 |  |  |  |  |

## Table S5. Characteristics of Syrian participants and their association with anxiety symptoms

|  | Total | | GAD-7<10 | | GAD-7≥10 | | Odds Ratio | | (95%CI) | |
| --- | --- | --- | --- | --- | --- | --- | --- | --- | --- | --- |
|  | n=661 | (%) | n=340 | (52.8%) | n=321 | (47.2%) |  |  | |  |
| **Age Median (IQR)** | 34 | (26-41) | 34 | (25-41) | 34 | (26-42) | 1.00 | (0.99-1.02) | | |
| Missing | 2 |  | 0 |  | 2 |  |  |  | |  |
| **Sex** |  |  |  |  |  |  |  |  | |  |
| Male | 335 | (49.9) | 174 | (52.8) | 161 | (47.2) |  |  | |  |
| Female | 326 | (50.1) | 166 | (52.8) | 160 | (47.2) | 1.00 | (0.72-1.39) | | |
| **Education** |  |  |  |  |  |  |  |  | |  |
| School not attended | 95 | (15.1) | 38 | (43.4) | 57 | (56.6) |  |  | |  |
| School not completed | 448 | (70.7) | 235 | (52.9) | 213 | (47.1) | 0.68 | (0.42-1.11) | | |
| School completed | 51 | (8.4) | 31 | (63.4) | 20 | (36.6) | 0.44 | (0.21-0.94) | | |
| Vocational | 18 | (2.9) | 8 | (51.2) | 10 | (48.8) | 0.73 | (0.25-2.14) | | |
| Higher education | 18 | (2.9) | 12 | (71.5) | 6 | (28.5) | 0.31 | (0.10-0.92) | | |
| Missing | 31 |  | 16 |  | 15 |  |  |  | |  |
| **Marital status** |  |  |  |  |  |  |  |  | |  |
| Single/ Engaged | 107 | (16.3) | 69 | (65.8) | 38 | (34.2) |  |  | |  |
| Married | 522 | (78.7) | 258 | (50.7) | 264 | (49.3) | 1.87 | (1.18-2.96) | | |
| Divorced/ Separated/ Widowed | 32 | (5.1) | 13 | (44.3) | 19 | (55.7) | 2.42 | (1.01-5.81) | | |
| **Pain that impacted usual activity** |  |  |  |  |  |  |  |  | |  |
| No | 443 | (66.9) | 249 | (57.1) | 194 | (42.9) |  |  | |  |
| Yes | 218 | (33.1) | 91 | (44.3) | 127 | (55.7) | 1.67 | (1.17-2.37) | | |
| **No. of chronic illness Range (0-4) Median (IQR)** | 0 | (0-0) | 0 | (0-0) | 0 | (0-0) | 0.96 | (0.75-1.22) | | |
| **Eviction notice** |  |  |  |  |  |  |  |  | |  |
| No | 492 | (75.0) | 271 | (56.1) | 221 | (43.9) |  |  | |  |
| Yes | 164 | (25.0) | 67 | (43.5) | 97 | (56.5) | 1.66 | (1.13-2.43) | | |
| Missing | 5 |  | 2 |  | 3 |  |  |  | |  |
| **Household water insecurity** |  |  |  |  |  |  |  |  | |  |
| Secure | 157 | (25.0) | 90 | (58.7) | 67 | (41.3) |  |  | |  |
| Insecure | 478 | (75.0) | 226 | (48.8) | 252 | (51.2) | 1.49 | (1.01-2.20) | | |
| Missing | 26 |  | 24 |  | 2 |  |  |  | |  |
| **Household food insecurity** |  |  |  |  |  |  |  |  | |  |
| Secure | 60 | (10.2) | 46 | (78.8) | 14 | (21.2) |  |  | |  |
| Insecure | 553 | (89.8) | 272 | (50.2) | 281 | (49.8) | 3.68 | (1.90-7.14) | | |
| Missing | 48 |  | 22 |  | 26 |  |  |  | |  |
| **Employment status** |  |  |  |  |  |  |  |  | |  |
| No | 396 | (61.3) | 200 | (52.8) | 196 | (47.2) |  |  | |  |
| Yes | 265 | (38.7) | 140 | (52.9) | 125 | (47.1) | 1.00 | (0.72-1.39) | | |
| **Cash assistance** |  |  |  |  |  |  |  |  | |  |
| No | 355 | (56.3) | 197 | (57.0) | 158 | (43.0) |  |  | |  |
| Yes | 283 | (43.7) | 135 | (48.7) | 148 | (51.3) | 1.40 | (1.00-1.95) | | |
| Missing | 23 |  | 8 |  | 15 |  |  |  | |  |
| **Having debt** |  |  |  |  |  |  |  |  | |  |
| No | 135 | (23.0) | 102 | (75.3) | 33 | (24.7) |  |  | |  |
| Yes | 482 | (77.0) | 228 | (49.1) | 254 | (50.9) | 3.17 | (1.99-5.04) | | |
| Missing | 44 |  | 10 |  | 34 |  |  |  | |  |
| **Feeling safe inside home** |  |  |  |  |  |  |  |  | |  |
| Very safe | 367 | (54.5) | 212 | (58.4) | 155 | (41.6) |  |  | |  |
| Somewhat safe | 244 | (38.9) | 114 | (48.6) | 130 | (51.4) | 1.49 | (1.05-2.11) | | |
| Not safe at all | 47 | (6.6) | 12 | (29.3) | 35 | (70.7) | 3.39 | (1.62-7.06) | | |
| Missing | 3 |  | 2 |  | 1 |  |  |  | |  |
| **Number of people to count on in difficult times** |  |  |  |  |  |  |  |  | |  |
| None | 158 | (24.2) | 90 | (57.7) | 68 | (42.3) |  |  | |  |
| One | 261 | (39.1) | 94 | (37.7) | 167 | (62.3) | 2.25 | (1.46-3.47) | | |
| Two to five | 227 | (34.7) | 145 | (64.7) | 82 | (35.3) | 0.75 | (0.48-1.16) | | |
| Six and more | 12 | (2.0) | 10 | (87.0) | 2 | (13.0) | 0.20 | (0.04-0.99) | | |
| Missing | 3 |  | 1 |  | 2 |  |  |  | |  |
| **Legal status documentation** |  |  |  |  |  |  |  |  | |  |
| No | 520 | (79.1) | 263 | (52.1) | 257 | (47.9) |  |  | |  |
| Yes | 132 | (20.9) | 74 | (58.0) | 58 | (42.0) | 0.79 | (0.52-1.19) | | |
| Missing | 9 |  | 3 |  | 6 |  |  |  | |  |

## Table S6. Predictors of depressive and anxiety symptoms among Lebanese adults

| **PHQ-9≥10** | | | | **GAD-7≥10** | | | |
| --- | --- | --- | --- | --- | --- | --- | --- |
| **PHQ-9≥10** | **Codes** | **Penalised Coefficients** | **OR (95%CI)** |  | **Codes** | **Penalised Coefficients** | **OR (95%CI)** |
| **Education** |  |  | 1 | **Age** | - | -0.01 | 0.99 (0.97-1.01) |
| School not attended | 0 | 0.46 | 0.62 (0.36-1.08) | **Education** |  |  |  |
| School not completed | 1 | - | 0.39 (0.18-0.81) | School not attended | 0 | 0.62 | 1 |
| School completed | 2 | -0.18 | 0.56 (0.26-1.21) | School not completed | 1 | - | 0.53 (0.30-0.92) |
| Vocational school | 3 | - | 0.51 (0.27-0.98) | School completed | 2 | - | 0.47 (0.22-0.97) |
| Higher education | 4 | - | 0.62 (0.36-1.08) | Vocational school | 3 | - | 0.41 (0.19-0.89) |
| **No. of chronic illness** | - | 0.05 | 1.09 (0.93-1.28) | Higher education | 4 | -0.23 | 0.36 (0.18-0.72) |
| **Pain impacted usual activity** |  |  |  | **Marital status** |  |  |  |
| No | 0 | - | 1 | Single/ Engaged | 0 | - | 1 |
| Yes | 1 | 0.68 | 1.92 (1.31-2.83) | Married | 1 | - | 1.08 (0.72-1.61) |
| **Eviction notice** |  |  |  | Divorced/ Separated/ Widowed | 2 | 0.15 | 1.38 (0.75-2.54) |
| No | 0 | -0.75 | 11 | **Pain impacted usual activity** |  |  |  |
| Yes | 1 | - | 1.79 (0.89-3.60) | No | 0 | - | 1 |
| Owned | 2 | - | 4.39 (1.40-13.7) | Yes | 1 | 0.78 | 2.28 (1.57-3.31) |
| **Household water insecurity** |  |  |  | **Eviction notice** |  |  |  |
| Secure | 0 | - | 1 | No | 0 | -0.65 | 1 |
| Insecure | 1 | 0.56 | 1.92 (1.27-2.90) | Yes | 1 | - | 1.66 (0.82-3.32) |
| **Household food insecurity** |  |  |  | Owned | 2 | - | 3.21 (1.23-7.94) |
| Secure | 0 | - | 1 | **Household water insecurity** |  |  |  |
| Insecure | 1 | 1.81 | 6.18 (3.85-9.93) | Secure | 0 | - | 1 |
| **Having debt** |  |  |  | Insecure | 1 | 0.18 | 1.29 (0.88-1.89) |
| No | 0 | - | 1 | **Household food insecurity** |  |  |  |
| Yes | 1 | 0.91 | 261 (1.83-3.72) | Secure | 0 | - | 1 |
| **Feeling safe inside home** |  |  |  | Insecure | 1 | 1.69 | 5.41 (3.51-8.34) |
| Very safe | 0 | -0.63 | 1 | **Having debt** |  |  |  |
| Somewhat safe | 1 | - | 1.94 (1.37-2.76) | No | 0 | - | 1 |
| Not safe at all | 2 | 0.34 | 3.62 (1.51-8.66) | Yes | 1 | 1.13 | 3.14 (2.21-4.46) |
| **Type of tenure** |  |  |  | **Feeling safe inside home** |  |  |  |
| Rent | 0 | 0.89 | 1 | Very safe | 0 | -0.76 | 1 |
| Owned | 1 | - | 0.20 (0.06-0.62) | Somewhat safe | 1 | - | 2.11 (1.50-2.96) |
| Other/ Hosted | 2 | -0.23 | 0.15 (0.01-1.26) | Not safe at all | 2 | 0.35 | 3.53 (1.49-8.34) |
| **Number of people to count on in difficult times** |  |  |  | **Type of tenure** |  |  |  |
| Zero | 0 | 0.32 | 1 | Rent | 0 | 0.51 | 1 |
| One | 1 | - | 0.68 (0.38-1.00) | Owned | 1 | - | 0.38 (0.15-0.96) |
| Two to five | 2 | -1.05 | 0.22 (0.13-0.35) | Other/ Hosted | 2 | - | 0.49 (0.12-2.08) |
| Six or more | 3 | - | 0.83 (0.29-2.40) | **Number of people to count on in difficult times** |  |  |  |
|  |  |  |  | Zero | 0 | 0.21 | 1 |
|  |  |  |  | One | 1 | - | 0.74 (0.46-1.19) |
|  |  |  |  | Two to five | 2 | - | 0.26 (0.16-0.42) |
|  |  |  |  | Six or more | 3 | -1.03 | 0.61 (0.21-1.74) |

## Table S7. Predictors of depressive and anxiety symptoms among Syrian adults

| **PHQ-9≥10** | | | | **GAD-7≥10** | | | |
| --- | --- | --- | --- | --- | --- | --- | --- |
|  | **Codes** | **Penalised Coefficients** | **OR (95%CI)** |  | **Codes** | **Penalised Coefficients** | **OR (95%CI)** |
| **Education** |  |  |  | **Education** |  |  |  |
| School not attended | 0 | 0.81 | 1 | School not attended | 0 | - | 1 |
| School not completed | 1 | - | 0.44 (0.23-0.84) | School not completed | 1 | - | 0.73 (0.44-1.23) |
| School completed | 2 | -0.36 | 0.25 (0.09-0.72) | School completed | 2 | -0.32 | 0.42 (0.18-0.96) |
| Vocational school | 3 | - | 0.57 (0.14-1.35) | Vocational school | 3 | - | 1.19 (0.37-3.84) |
| Higher education | 4 | - | 0.69 (0.16-2.90) | Higher education | 4 | - | 0.42 (0.12-1.47) |
| **Marital status** |  |  |  | **Pain impact usual activity** |  |  |  |
| Single/ Engaged | 0 | - | 1 | No | 0 | - | 1 |
| Married | 1 | - | 1.10 (0.57-2.09) | Yes | 1 | 0.39 | 1.55 (1.05-2.27) |
| Divorced/ Separated/ Widowed | 2 | 0.48 | 2.06 (0.62-6.79) | **Having debt** |  |  |  |
| **No. of chronic illness** |  | 0.21 | 1.31 (0.93-1.82) | No | 0 | - | 1 |
| **Pain impacted usual activity** |  |  |  | Yes | 1 | 1.26 | 2.87 (1.75-4.70) |
| No | 0 | - | 1 | **Feeling safe inside home** |  |  |  |
| Yes | 1 | 0.52 | 1.69 (1.05-2.70) | Very safe | 0 | -0.35 | 1 |
| **Eviction notice** |  |  |  | Somewhat safe | 1 | - | 1.29 (0.87-1.91) |
| No | 0 | - | 1 | Not safe at all | 2 | 0.91 | 3.65 (1.67-7.94) |
| Yes | 1 | 0.45 | 1.61 (0.97-2.68) | **Number of people to count on in difficult times** |  |  |  |
| **Household food insecurity** |  |  |  | Zero | 0 | - | 1 |
| Secure | 0 | - | 1 | One | 1 | 0.50 | 2.70 (1.66-4.37) |
| Insecure | 1 | 1.61 | 5.19 (1.82-14.80) | Two to five | 2 | -0.65 | 0.73 (0.44-1.23) |
| **Having debt** |  |  |  | Six or more | 3 | - | 0.40 (0.07-2.13) |
| No | 0 | - | 1 |  |  |  |  |
| Yes | 1 | 1.47 | 4.09 (2.12-7.87) |  |  |  |  |
| **Feeling safe inside home** |  |  |  |  |  |  |  |
| Very safe | 0 | -0.82 | 1 |  |  |  |  |
| Somewhat safe | 1 | - | 2.21 (1.36-3.59) |  |  |  |  |
| Not safe at all | 2 | 0.35 | 3.58 (1.47-8.72) |  |  |  |  |
| **Number of people to count on in difficult times** |  |  |  |  |  |  |  |
| Zero | 0 | - | 1 |  |  |  |  |
| One | 1 | 0.95 | 2.67 (1.46-4.90) |  |  |  |  |
| Two to five | 2 | -1.05 | 0.32 (0.16-0.60) |  |  |  |  |
| Six or more | 3 | - | 0.96 (0.17-5.28) |  |  |  |  |
| **Legal status documentation** |  |  |  |  |  |  |  |
| No | 0 | - | 1 |  |  |  |  |
| Yes | 1 | -0.54 | 0.56 (0.31-1.01) |  |  |  |  |

## Figure S1. Calibration plot of Lebanese anxiety symptom prediction model


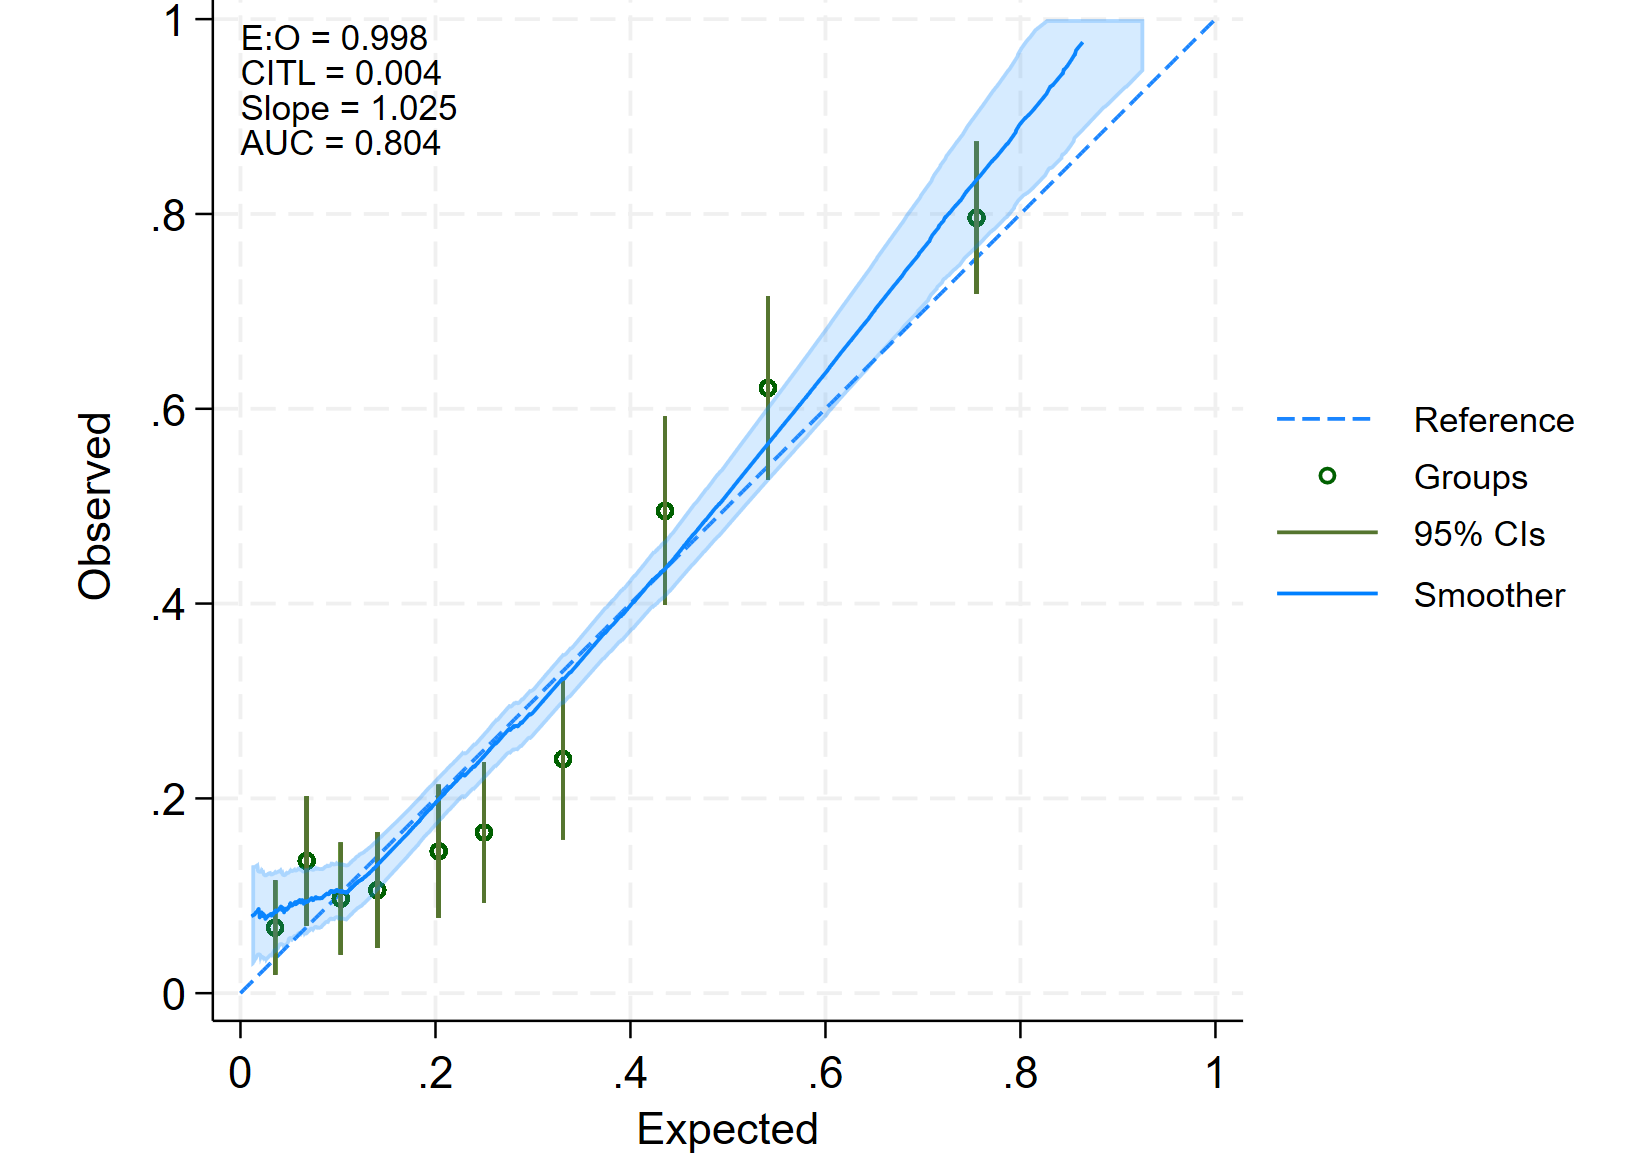


## Figure S2. Calibration plot of Syrian anxiety symptom prediction model


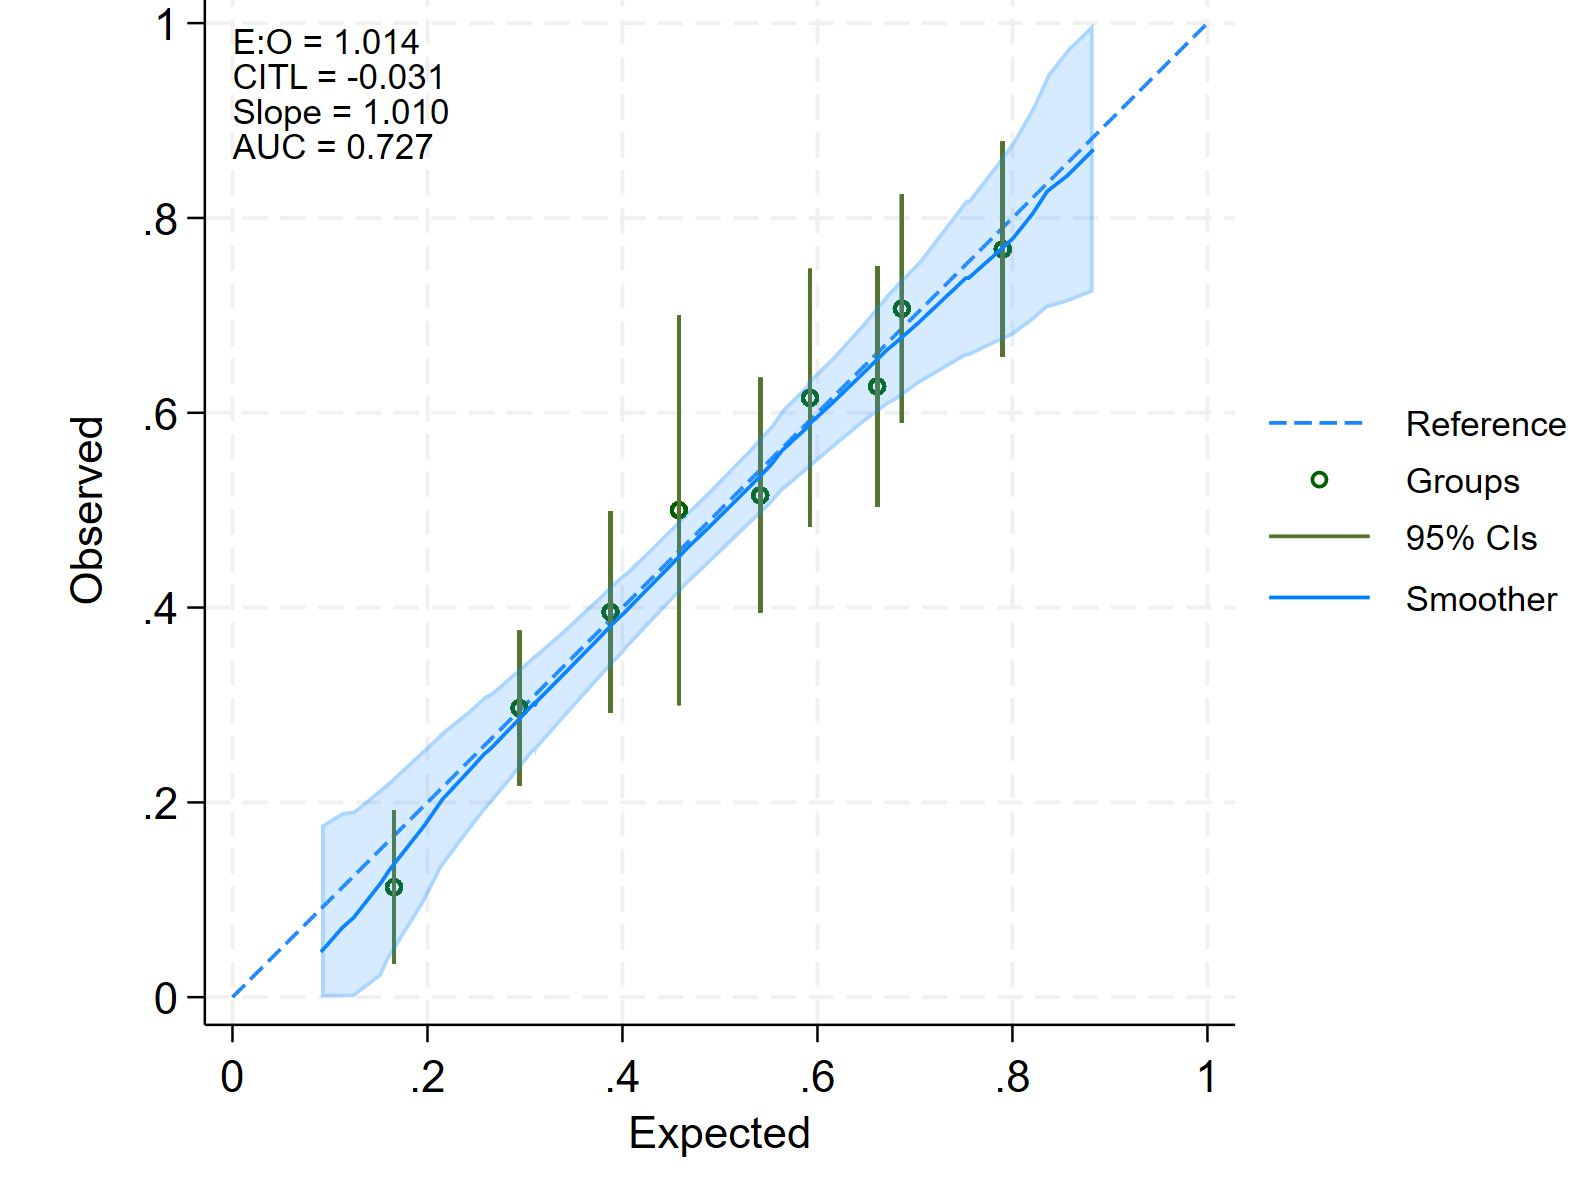

Supplement: Supplemental Material [file 316097_file02.docx]
